# Supplementary figures and images for: DDX60 selectively reduces translation off viral type II internal ribosome entry sites
Source: PubMed Central journal article supplement — EMBO Rep. 2022 Oct 18;23(12):e55218. doi: 10.15252/embr.202255218 (PMC9724679; doi:10.15252/embr.202255218), 2022-10-18

Figure 4D

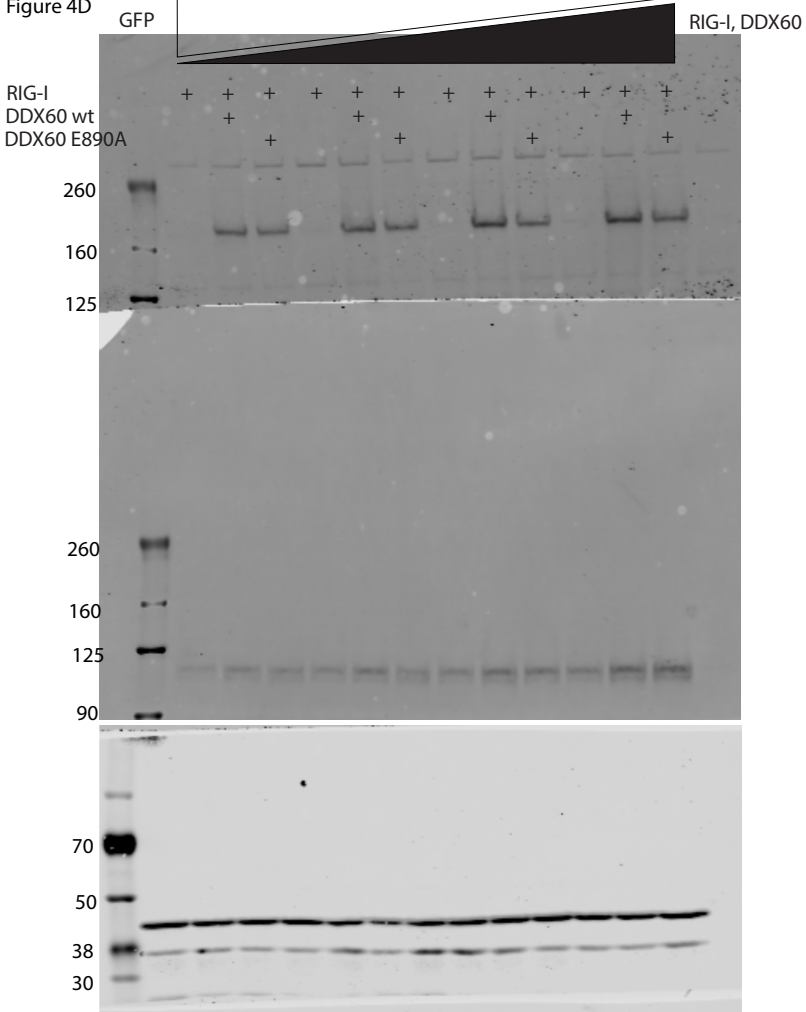

Supplement: EMBR-23-e55218-s003.pdf [file EMBR-23-e55218-s003.pdf]
